# Supplementary material for: An Improved Branch-and-Bound Algorithm for the One-Machine Scheduling Problem with Delayed Precedence Constraints
Source: Atypon-hosted journal article supplement (doi:10.1287/ijoc.2020.0988), 2020-11-16
Supplement: ijoc.2020.0988.sm2.pdf [file ijoc.2020.0988.sm2.pdf]

Authors are encouraged to submit new papers to INFORMS journals by means of a style file template, which includes the journal title. However, use of a template does not certify that the paper has been accepted for publication in the named journal. INFORMS journal templates are for the exclusive purpose of submitting to an INFORMS journal and should not be used to distribute the papers in print or online or to submit the papers to another publication.

*Online supplement for*  
An Improved Branch-and-bound Algorithm for the  
One-machine Scheduling Problem with Delayed  
Precedence Constraints

Wenda Zhang

Department of Industrial and Systems Engineering, University of Illinois at Urbana-Champaign

Jason J. Sauppe

Department of Computer Science, University of Wisconsin-La Crosse

Sheldon H. Jacobson

Department of Computer Science, University of Illinois at Urbana-Champaign

---

## A. Additional Results

In this online supplement, we provide additional results on MLTH:

Table 1: Ratio of MLTH used in all iterations on  $1|r_i, q_i|C_{max}$  instances

| No. Jobs   | $k = 15$ | $k = 20$ | $k = 25$ |
|------------|----------|----------|----------|
| $n = 50$   | 0.4760   | 0.8635   | 0.8179   |
| $n = 100$  | 0.5890   | 0.8630   | 0.8605   |
| $n = 200$  | 0.7397   | 0.8726   | 0.8675   |
| $n = 500$  | 0.8646   | 0.8658   | 0.8792   |
| $n = 1000$ | 0.8558   | 0.9204   | 0.8668   |

Table 2: Ratio of MLTH used in all iterations on  $1|r_i, q_i, dpc|C_{max}$  instances

| No. Jobs  | $k = 10, p = 0.01$ | $k = 10, p = 0.02$ | $k = 15, p = 0.01$ | $k = 15, p = 0.02$ |
|-----------|--------------------|--------------------|--------------------|--------------------|
| $n = 50$  | 0.4590             | 0.7268             | 0.7839             | 0.6763             |
| $n = 100$ | 0.7536             | 0.6017             | 0.7086             | 0.5813             |

Table 3: Percentage difference from optimal solutions on  $1|r_i, q_i|C_{max}$  instances

| No. Jobs   | $k = 15$ |       | $k = 20$ |       | $k = 25$ |       |
|------------|----------|-------|----------|-------|----------|-------|
|            | LTH      | MLTH  | LTH      | MLTH  | LTH      | MLTH  |
| $n = 50$   | 0.93%    | 0.67% | 0.93%    | 0.21% | 0.70%    | 0.15% |
| $n = 100$  | 0.54%    | 0.30% | 0.45%    | 0.10% | 0.35%    | 0.06% |
| $n = 200$  | 0.28%    | 0.11% | 0.22%    | 0.04% | 0.17%    | 0.03% |
| $n = 500$  | 0.12%    | 0.03% | 0.08%    | 0.02% | 0.07%    | 0.01% |
| $n = 1000$ | 0.05%    | 0.01% | 0.04%    | 0.01% | 0.03%    | 0.01% |

Table 4: Percentage difference from optimal solutions on  $1|r_i, q_i, dpc|C_{max}$  instances

| No. Jobs  | $k = 10, p = 0.01$ |       | $k = 10, p = 0.02$ |       | $k = 15, p = 0.01$ |       | $k = 15, p = 0.02$ |       |
|-----------|--------------------|-------|--------------------|-------|--------------------|-------|--------------------|-------|
|           | LTH                | MLTH  | LTH                | MLTH  | LTH                | MLTH  | LTH                | MLTH  |
| $n = 50$  | 2.73%              | 3.65% | 2.03%              | 1.17% | 1.40%              | 0.67% | 0.85%              | 0.48% |
| $n = 100$ | 0.83%              | 0.46% | 0.33%              | 0.26% | 0.37%              | 0.21% | 0.14%              | 0.11% |
